# Supplementary material
Source: Springer Nature journal article supplement (https://www.springermedizin.de/resource/supplementary/12885_2013_4429_MOESM2_ESM.pdf/9466336)

**A**

Ctrl scFv

1:9#7 scFv

1:9#9 scFv

MUC16

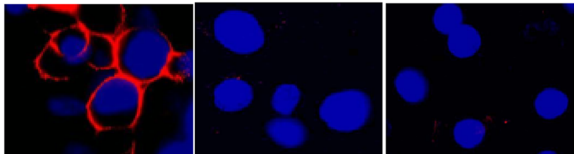**B**

OVCAR3

Ctrl scFv

1:9#7 scFv

1:9#9 scFv

MUC16 →

Tubulin →

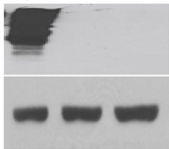

Supplement: MOESM2 [file 9466336]
